# Supplementary figures and images for: Generative network modeling reveals quantitative definitions of bilateral symmetry exhibited by a whole insect brain connectome
Source: eLife journal article supplement (doi:10.7554/elife.83739), 2023-03-28

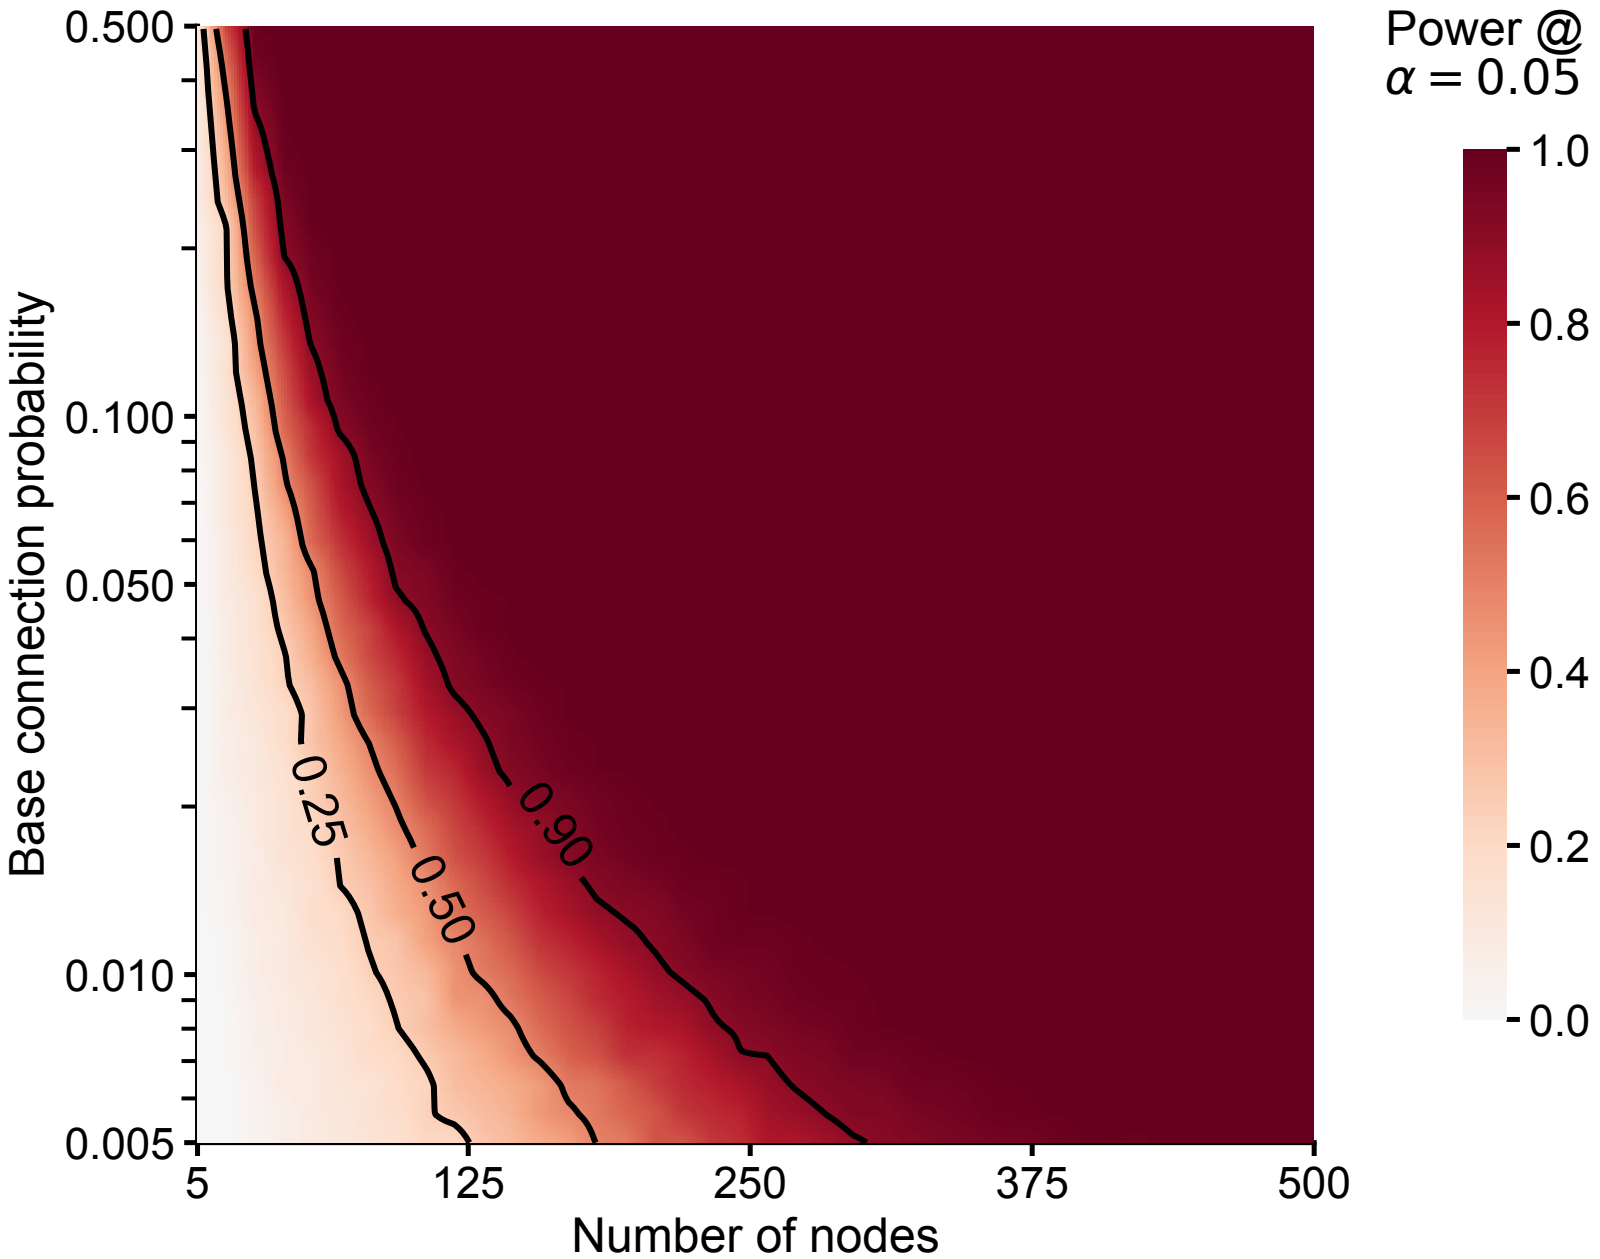

Supplement: supp [file elife-83739-supp-v1.zip]

Overall

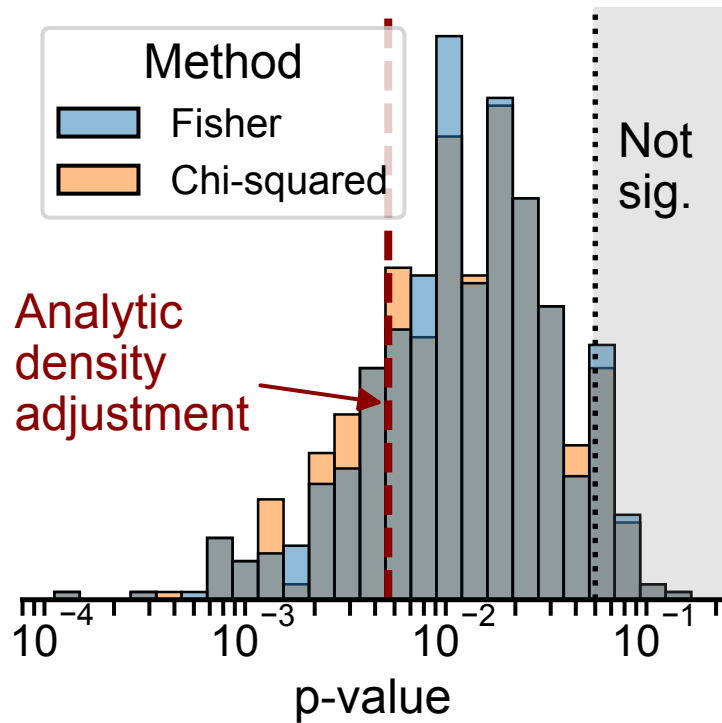Subgraph: KC  $\rightarrow$  KC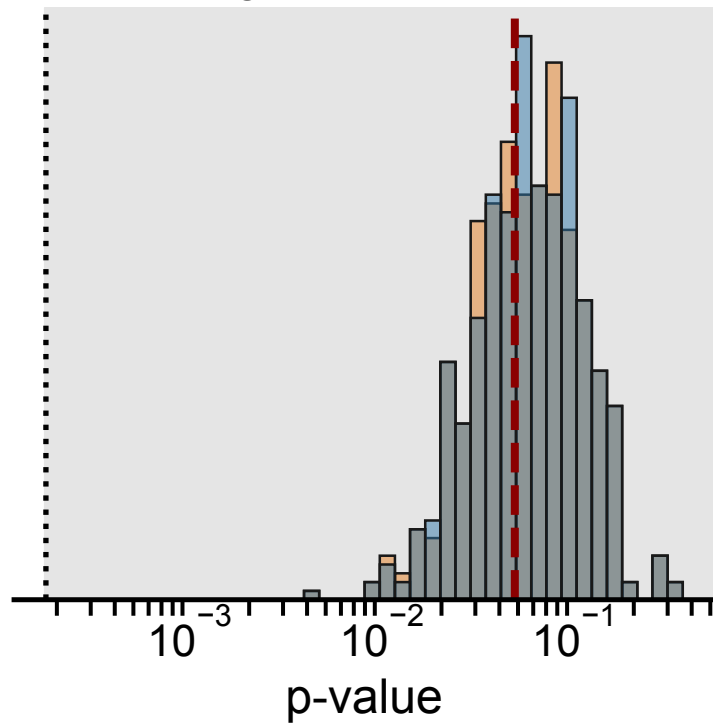Subgraph: KC  $\rightarrow$  MBON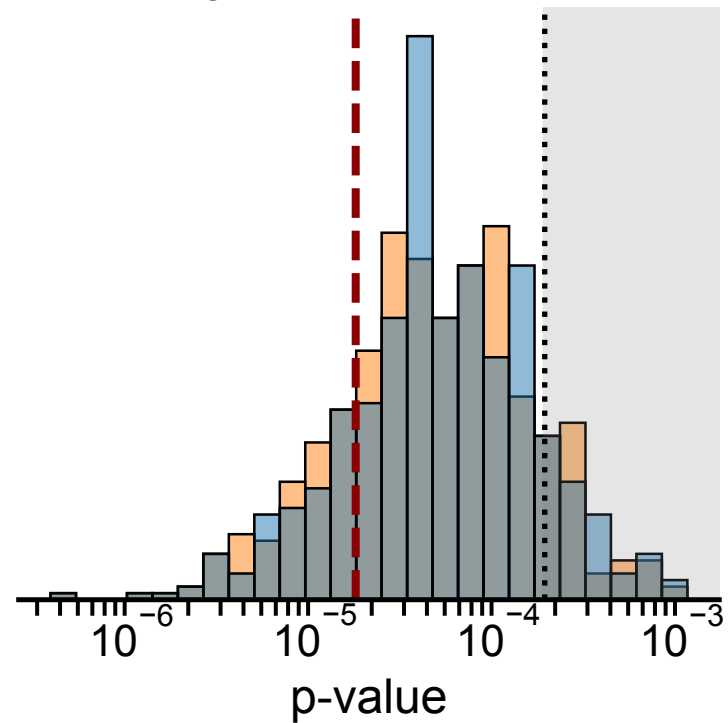

Supplement: supp [file elife-83739-supp-v1.zip]

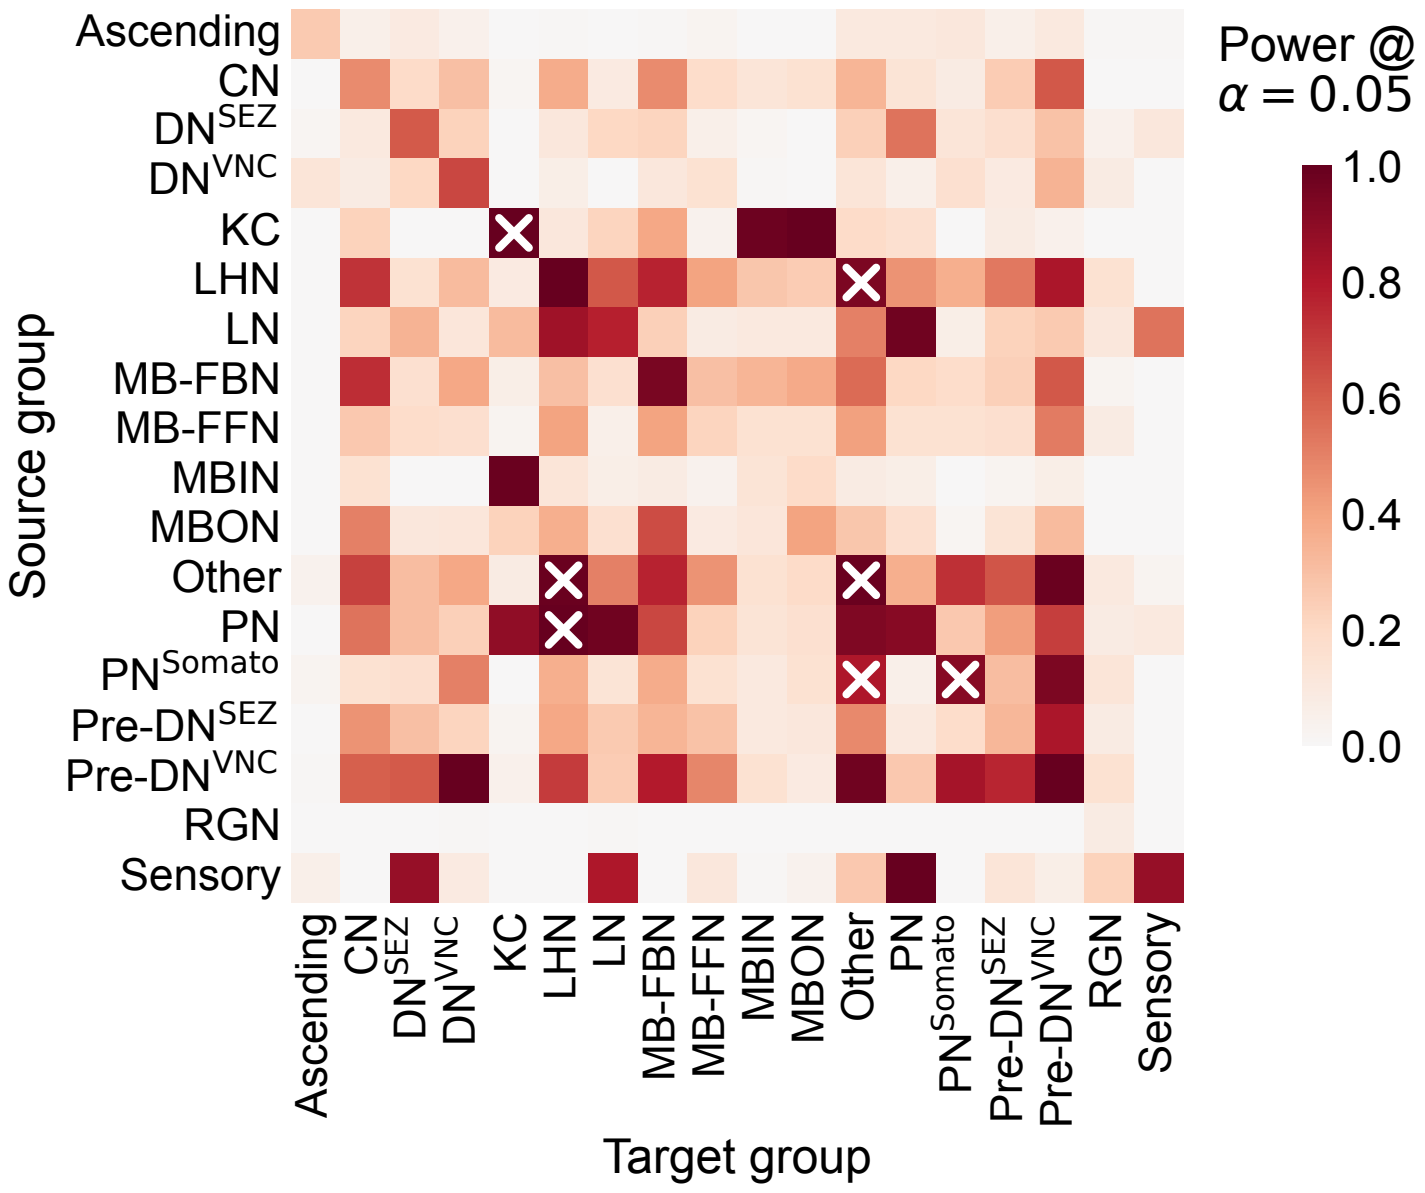

Supplement: supp [file elife-83739-supp-v1.zip]

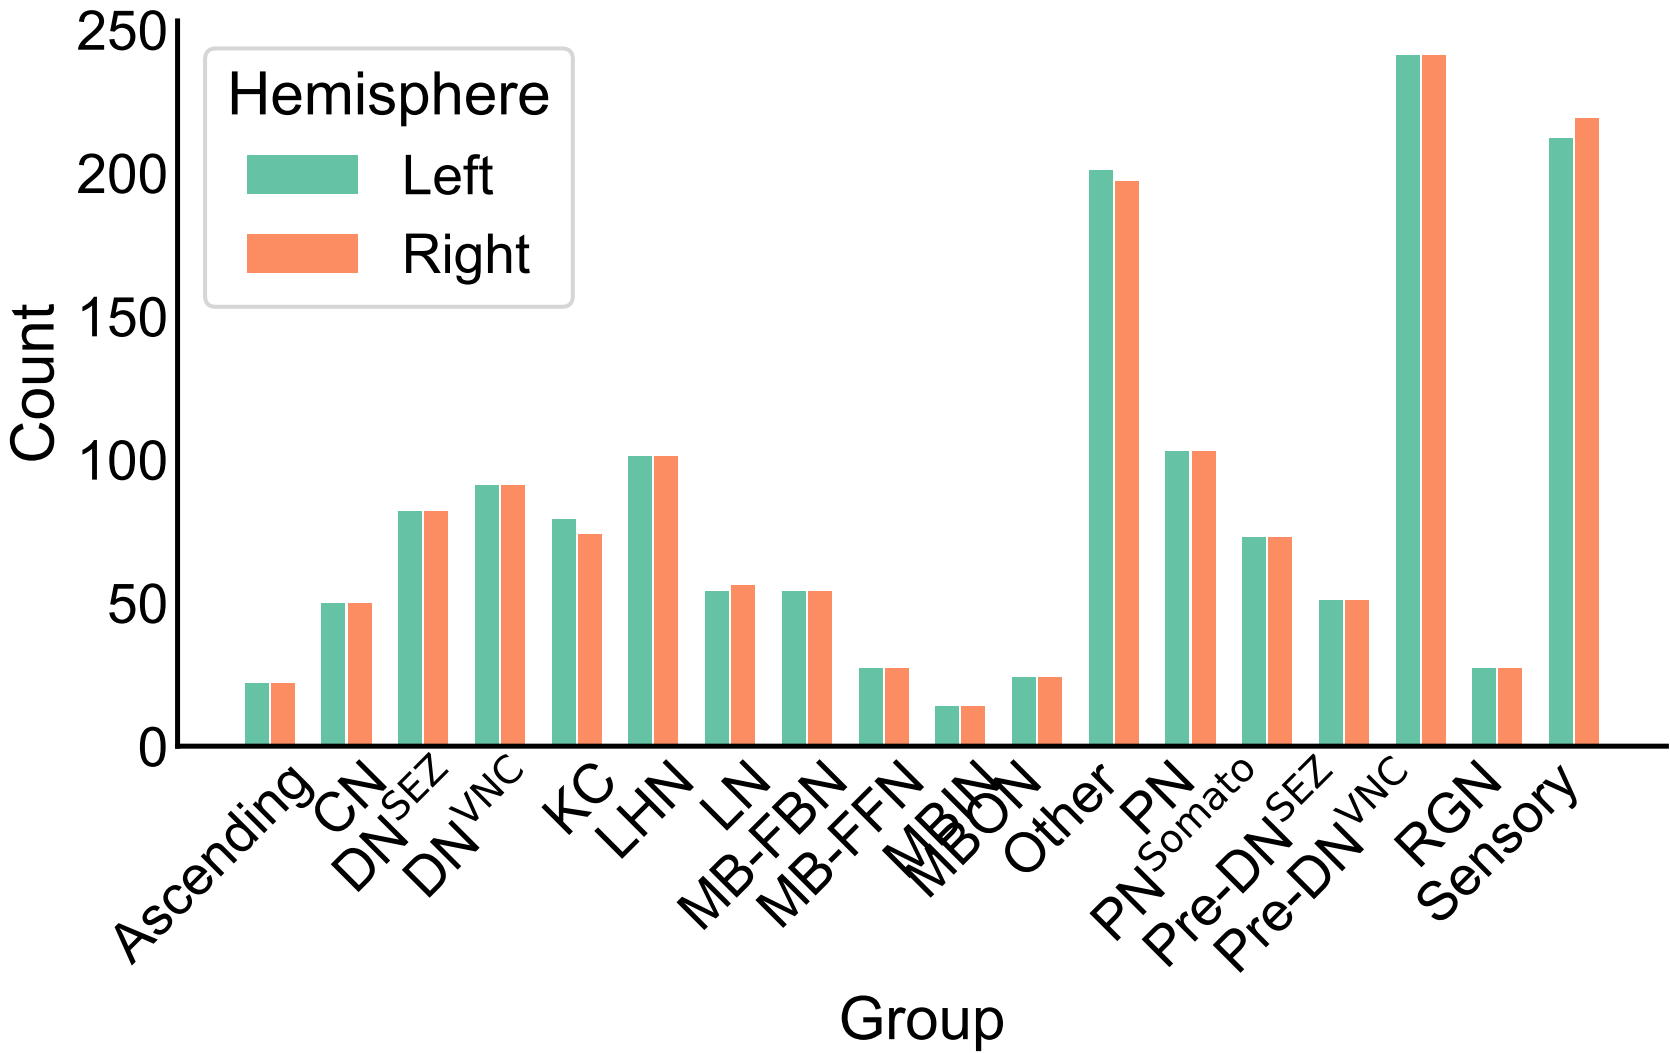

Supplement: supp [file elife-83739-supp-v1.zip]

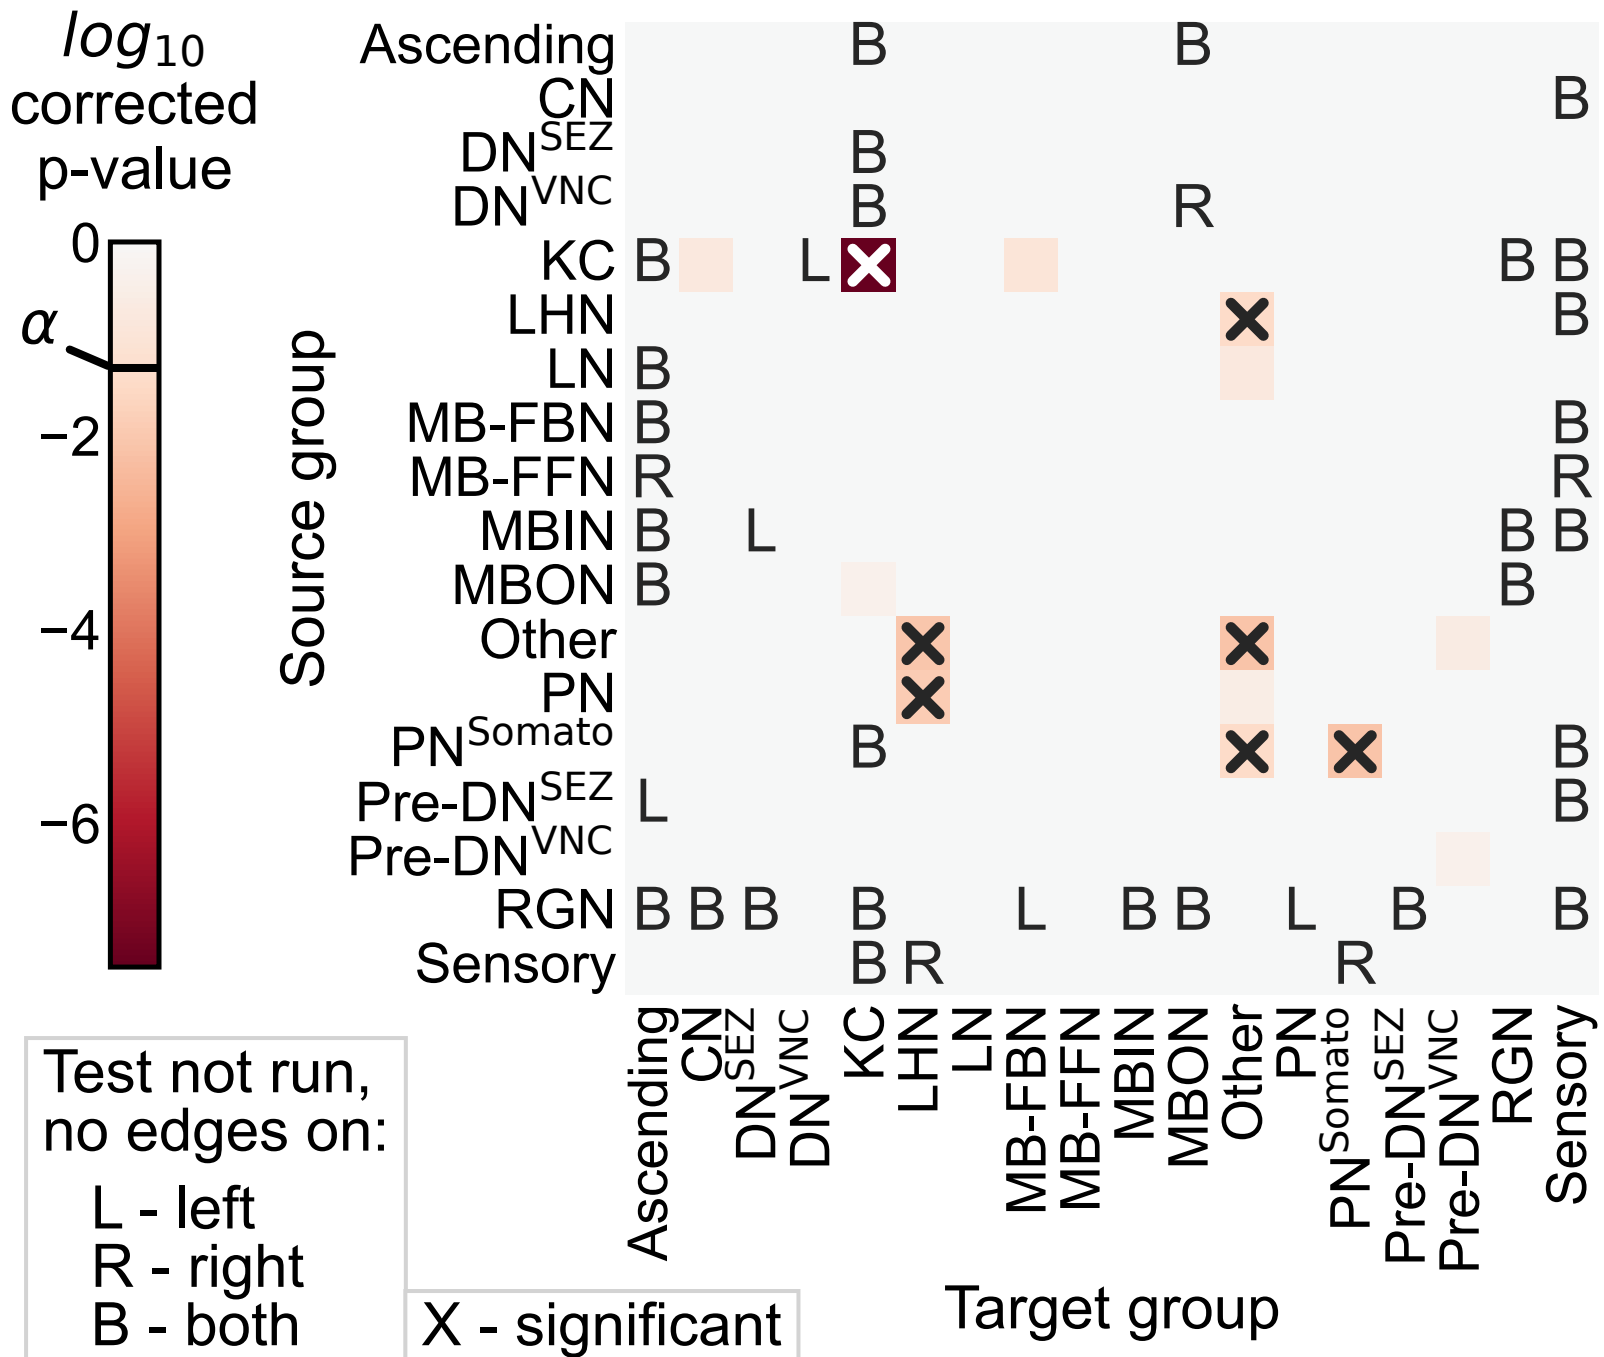

Supplement: supp [file elife-83739-supp-v1.zip]

A) Synapse thresholding p-values

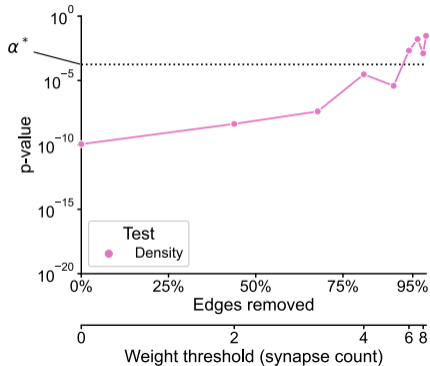

B) Input thresholding p-values

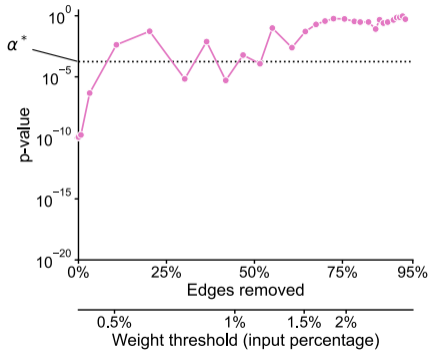

Supplement: supp [file elife-83739-supp-v1.zip]

A)

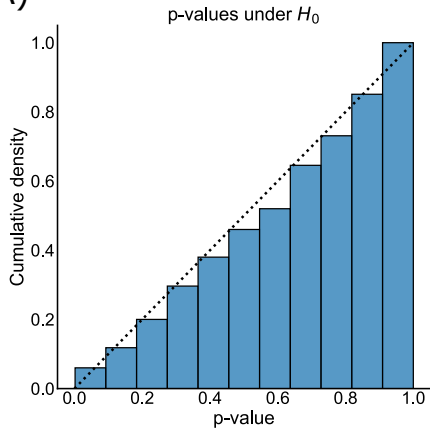

B)

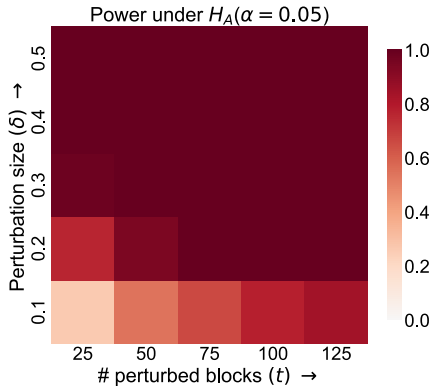

Supplement: supp [file elife-83739-supp-v1.zip]
